# Supplementary material
Source: PubMed Central journal article supplement (PMC11142891)
Supplement: NIHMS1992474-supplement-1.pdf [file NIHMS1992474-supplement-1.pdf]

# THE LANCET

## Microbe

### **Supplementary appendix**

This appendix formed part of the original submission and has been peer reviewed.  
We post it as supplied by the authors.

Supplement to: Kay A, Vasiliu A, Carratala-Castro L, et al. Performance of a stool-based quantitative PCR assay for the diagnosis of tuberculosis in adolescents and adults: a multinational, prospective diagnostic accuracy study. *Lancet Microbe* 2024. [https://doi.org/10.1016/S2666-5247\(23\)00391-9](https://doi.org/10.1016/S2666-5247(23)00391-9)

**Performance of a stool-based quantitative PCR assay for the diagnosis of tuberculosis in adolescents and adults: a multinational, prospective diagnostic accuracy study**

*Alexander Kay, Anca Vasiliu, Lucia Carratala-Castro, Bariki Mtafya, Jose Euberto Mendez-Reyes, Nontobeko Maphalala, Shilzia Munguambe, Durbbin Mulengwa, Tara Ness, Belen Saavedra, Jason Bacha, Gugu Maphalala, Rojelio Mejia, Godwin Mtetwa, Sozinho Acacio, Patricia Manjate, Edson Mambuque, Nosisa Shiba, Nokwanda Kota, Mangaliso Ziyane, Nyanda Elias Ntinginya, Christoph Lange, H Lester Kirchner, Andrew R DiNardo, Alberto L Garcia-Basteiro, Anna Maria Mandalakas*

**Global TB Program, Department of Pediatrics** (A Kay MD, A Vasiliu PhD, J E Mendez-Reyes MD, T Ness MD, G Mtetwa PgDip (TB-HIV), C Lange MD, H L Kirchner, A R DiNardo MD, A M Mandalakas MD) **and Pediatric Tropical Medicine** (R Mejia MD), **Baylor College of Medicine, Houston, TX, USA; Baylor College of Medicine Children's Foundation Eswatini, Mbabane, Eswatini** (A Kay, N Maphalala MS, D Mulengwa MS, N Shiba MD, N Kota MD, M Ziyane, BSc); **Barcelona Institute for Global Health, Hospital Clínic, Universitat de Barcelona, Barcelona, Spain** (L Carratala-Castro MD, B Saavedra PhD, A L Garcia-Basteiro PhD); **Centro de Investigação em Saude de Manhiça (CISM), Maputo, Mozambique** (L Carratala-Castro, S Munguambe BsC, B Saavedra, S Acacio MD, P Manjate BsC, E Mambuque MsC, A L Garcia-Basteiro); **National Institute for Medical Research (NIMR)-Mbeya Medical Research Center, Mbeya, Tanzania** (B Mtafya PhD, N E Ntinginya PhD); **Baylor College of Medicine Children's Foundation Mbeya, Mbeya, Tanzania** (J Bacha MD); **Eswatini Health Laboratory Service, Mbabane, Eswatini** (G Maphalala MsC, M Ziyane Bsc); **Division of Clinical Infectious Diseases, Research Center Borstel, Borstel, Germany** (C Lange, A M Mandalakas); **German Center for Infection Research (DZIF), Partner Site Hamburg-Lübeck-Borstel-Riems, Borstel, Germany** (C Lange, A M Mandalakas); **Respiratory Medicine and International Health, University of Lübeck, Lübeck, Germany** (C Lange); **Department of Population Health Sciences, Geisinger, Danville, PA, USA** (H L Kirchner); **Department of Internal Medicine and Radboud Center for Infectious Diseases, Radboud University Medical Center, Nijmegen, Netherlands** (A R DiNardo); **Centro de Investigación Biomédica en Red de Enfermedades Infecciosas (CIBERINFEC), Barcelona, Spain** (A L Garcia-Basteiro); **Department of Epidemiology, Human Genetics, and Environmental Sciences, University of Texas Health School of Public Health, Houston, TX, USA** (A M Mandalakas)

Corresponding Author:

Alexander Kay, MD, 1102 Bates St, FC-630, Houston, TX 77030, Tel: +268-7666-4967, email: Alexander.Kay@bcm.edu

## **Table of Contents**

|                                  |           |
|----------------------------------|-----------|
| <b>Supplemental Table 1</b>      | <b>3</b>  |
| <b>Supplemental Table 2</b>      | <b>4</b>  |
| <b>Supplemental Table 3</b>      | <b>5</b>  |
| <b>Supplemental Table 4</b>      | <b>6</b>  |
| <b>Supplemental Figure 1 A-C</b> | <b>7</b>  |
| <b>Supplemental Figure 2 A-B</b> | <b>8</b>  |
| <b>Supplemental Figure 3 A-C</b> | <b>9</b>  |
| <b>Supplemental Materials</b>    | <b>11</b> |

**Supplemental Table 1. Stool qPCR result agreement with sputum Xpert-Ultra, sputum culture and stool Xpert-Ultra in the complete cohort inclusive of cases and controls and by study site.**

| Reference and Comparator tests | Stool qPCR Positive |           | Stool qPCR Negative |            | Agreement ( $p_0^1$ ) |
|--------------------------------|---------------------|-----------|---------------------|------------|-----------------------|
|                                | N (%)               | N (%)     | N (%)               | N (%)      | % (95%CI)             |
| <b>All Sites</b>               |                     |           |                     |            |                       |
| Sputum Xpert-Ultra<br>n = 313  | +                   | -         | +                   | -          |                       |
|                                | 118 (37.6)          | 29 (9.3)  | 16 (5.1)            | 150 (47.9) | 85.6 (81.2, 89.3)     |
| Sputum Culture<br>n = 250      | +                   | -         | +                   | -          |                       |
|                                | 104 (41.6)          | 29 (11.6) | 7 (2.8)             | 110 (44.0) | 85.6 (80.6, 89.7)     |
| Stool Xpert-Ultra<br>n = 377   | +                   | -         | +                   | -          |                       |
|                                | 114 (30.2)          | 35 (9.3)  | 11 (2.9)            | 217 (57.6) | 87.8 (84.1, 90.9)     |
| <b>Eswatini</b>                |                     |           |                     |            |                       |
| Sputum Xpert-Ultra<br>n = 113  | +                   | -         | +                   | -          |                       |
|                                | 59 (52.2)           | 7 (6.2)   | 9 (8.0)             | 38 (33.6)  | 85.8 (78.0, 91.7)     |
| Sputum Culture<br>n = 86       | +                   | -         | +                   | -          |                       |
|                                | 53 (61.6)           | 9 (10.5)  | 3 (3.5)             | 21 (24.4)  | 86.0 (76.9, 92.6)     |
| Stool Xpert-Ultra<br>n = 168   | +                   | -         | +                   | -          |                       |
|                                | 59 (35.1)           | 11 (6.5)  | 4 (2.4)             | 94 (56.0)  | 91.1 (85.7, 94.9)     |
| <b>Mozambique</b>              |                     |           |                     |            |                       |
| Sputum Xpert-Ultra<br>n = 166  | +                   | -         | +                   | -          |                       |
|                                | 58 (34.9)           | 20 (12.0) | 4 (2.4)             | 84 (50.6)  | 85.5 (79.3, 90.5)     |
| Sputum Culture<br>n = 132      | +                   | -         | +                   | -          |                       |
|                                | 50 (37.9)           | 18 (13.6) | 2 (1.5)             | 62 (47.0)  | 84.8 (77.6, 90.5)     |
| Stool Xpert-Ultra<br>n = 162   | +                   | -         | +                   | -          |                       |
|                                | 53 (30.9)           | 24 (14.8) | 4 (2.5)             | 81 (50.0)  | 82.7 (76.0, 88.2)     |
| <b>Tanzania</b>                |                     |           |                     |            |                       |
| Sputum Xpert-Ultra<br>n = 34   | +                   | -         | +                   | -          |                       |
|                                | 1 (2.9)             | 2 (5.9)   | 3 (8.8)             | 28 (82.4)  | 85.3 (68.9, 95.0)     |
| Sputum Culture<br>n = 27       | +                   | -         | +                   | -          |                       |
|                                | 1 (3.1)             | 2 (6.3)   | 2 (6.3)             | 25 (84.4)  | 87.5 (71.0, 96.5)     |
| Stool Xpert-Ultra<br>n = 38    | +                   | -         | +                   | -          |                       |
|                                | 2                   | 0         | 1                   | 35         | 93.6 (82.5, 98.7)     |

Abbr: + denotes a positive result for the reference or comparator test in the same row and – denotes a negative result for the reference or comparator test in the same row. <sup>1</sup>The proportion of agreement observed was calculated as the sum of tests in agreement as negative or positive divided by the sum of all test results.

**Supplemental Table 2. Paired comparisons of stool qPCR and stool Xpert sensitivity compared to a complete microbiologic reference standard.**

| Paired comparisons of stool qPCR and stool Xpert sensitivity compared to the Complete MRS <sup>1</sup> |                        |                               |              |
|--------------------------------------------------------------------------------------------------------|------------------------|-------------------------------|--------------|
| Positive by Complete MRS                                                                               | Stool qPCR Sensitivity | Stool Xpert-Ultra Sensitivity | p-value      |
|                                                                                                        | % (95% CI)             | % (95% CI)                    |              |
| PLHIV (N = 79)                                                                                         | 81.0 (70.6, 89.0)      | 68.4 (56.9, 78.4)             | <b>0.016</b> |
| HIV Negative (N = 57)                                                                                  | 89.5 (78.5, 96.0)      | 91.2 (80.7, 97.1)             | 1.00         |
| Adult (N = 118)                                                                                        | 86.3 (78.7, 92.0)      | 77.8 (69.2, 84.9)             | <b>0.034</b> |
| Adolescent (N = 20)                                                                                    | 75.0 (50.9, 91.3)      | 75.0 (50.9, 91.3)             | 1.00         |
| Complete (N = 137)                                                                                     | 84.7 (77.5, 90.3)      | 77.4 (69.4, 84.1)             | <b>0.044</b> |

<sup>1</sup>Complete Microbiologic Reference Standard (Complete MRS) Positive if sputum culture, sputum Xpert-Ultra and/or LAM in PLHIV when indicated are positive, valid results for all reference tests required for inclusion

**Supplemental Table 3: Characteristics of participants with tuberculosis with a detectable *M tuberculosis*-specific DNA by a novel qPCR test and undetectable *M tuberculosis*-specific DNA by Xpert-Ultra performed on stool, Xpert-Ultra performed on sputum, *M tuberculosis*-specific culture performed on sputum, and a negative urine LAM in people living with HIV (n=11).**

| <b>SITE</b> | <b>GROUP</b> | <b>SEX</b> | <b>HIV</b> | <b>Stool qPCR Result</b> | <b>qPCR CT</b> | <b>CXR RESULTS</b>           |
|-------------|--------------|------------|------------|--------------------------|----------------|------------------------------|
| MZ          | TB Case      | Male       | Negative   | MTB Gene Amplified       | 32·60          | Abnormal; consistent with TB |
| MZ          | TB Case      | Male       | Negative   | MTB Gene Amplified       | 34·14          | Abnormal; consistent with TB |
| MZ          | TB Case      | Male       | Negative   | MTB Gene Amplified       | 33·23          | Abnormal; consistent with TB |
| MZ          | TB Case      | Male       | Negative   | MTB Gene Amplified       | 34·17          | Normal                       |
| MZ          | TB Case      | Male       | Negative   | MTB Gene Amplified       | 34·03          | Abnormal; consistent with TB |
| MZ          | TB Case      | Female     | Positive   | MTB Gene Amplified       | 34·04          | Not available                |
| MZ          | TB Case      | Female     | Positive   | MTB Gene Amplified       | 31·64          | Abnormal; consistent with TB |
| MZ          | TB Case      | Male       | Negative   | MTB Gene Amplified       | 29·22          | Abnormal; consistent with TB |
| MZ          | TB Case      | Female     | Negative   | MTB Gene Amplified       | 32·70          | Not available                |
| MZ          | TB Case      | Male       | Positive   | MTB Gene Amplified       | 34·15          | Abnormal; consistent with TB |
| MZ          | TB Case      | Male       | Negative   | MTB Gene Amplified       | 33·91          | Abnormal; consistent with TB |

Abbr: MZ; Mozambique, qPCR; quantitative polymerase chain reaction, CT; cycle threshold, CXR; chest x-ray; TB; tuberculosis

**Supplemental Table 4. Characteristics of controls with detectable *M tuberculosis*-specific DNA by a novel stool qPCR test (n = 4) (A) and controls with detectable *M tuberculosis*-specific DNA by Xpert-Ultra (n = 2) performed on stool (B).**

**A.**

| SITE | Age          | Sex | HIV status | Sputum Xpert-Ultra | Culture | Stool Xpert-Ultra | Asymptomatic at Baseline | Asymptomatic at 6 months | TB treatment initiation based on clinical diagnosis | qPCR CT Value |
|------|--------------|-----|------------|--------------------|---------|-------------------|--------------------------|--------------------------|-----------------------------------------------------|---------------|
| EW   | <= 19        | M   | NR         | NA                 | NA      | MTB NOT detected  | NA                       | YES                      | NO                                                  | 36.55         |
| EW   | <= 19        | M   | NR         | NA                 | NA      | MTB NOT detected  | YES                      | YES                      | NO                                                  | 23.96         |
| MZ   | 20 and above | M   | NR         | MTB NOT detected   | NTM     | MTB NOT detected  | YES                      | YES                      | NO                                                  | 34.08         |
| MZ   | 20 and above | M   | Pos        | MTB NOT detected   | CTD     | MTB NOT detected  | YES                      | NA                       | NO                                                  | 34.69         |

**Abbr: MZ; Mozambique, EW; Eswatini, qPCR; quantitative polymerase chain reaction, NR; non-reactive, Pos; positive, CT; cycle threshold, MTB; Mycobacterium tuberculosis, NA; Not available, CTD; contaminated, NTM; non-tuberculous mycobacteria**

**B.**

| SITE | Age          | Sex | HIV status | Sputum Xpert-Ultra | Culture | Stool qPCR             | Asymptomatic at Baseline | Asymptomatic at 6 months | TB treatment initiation based clinical diagnosis | Xpert-Ultra SQ |
|------|--------------|-----|------------|--------------------|---------|------------------------|--------------------------|--------------------------|--------------------------------------------------|----------------|
| TZ   | <= 19        | F   | NR         | NA                 | NA      | MTB Gene NOT Amplified | YES                      | NA                       | NO                                               | Trace          |
| EW   | 20 and above | F   | Pos        | NA                 | NA      | MTB Gene NOT Amplified | YES                      | YES                      | NO                                               | Trace          |

**Abbr: TZ; Tanzania, EW; Eswatini, qPCR; quantitative polymerase chain reaction, MTB; Mycobacterium tuberculosis, NA; Not available, NR; non-reactive, Pos; positive, SQ; semi-quantitative**

**Supplemental Figure 1 A-C: Proportional Venn diagrams of the stool qPCR as compared to individual diagnostic tests.**

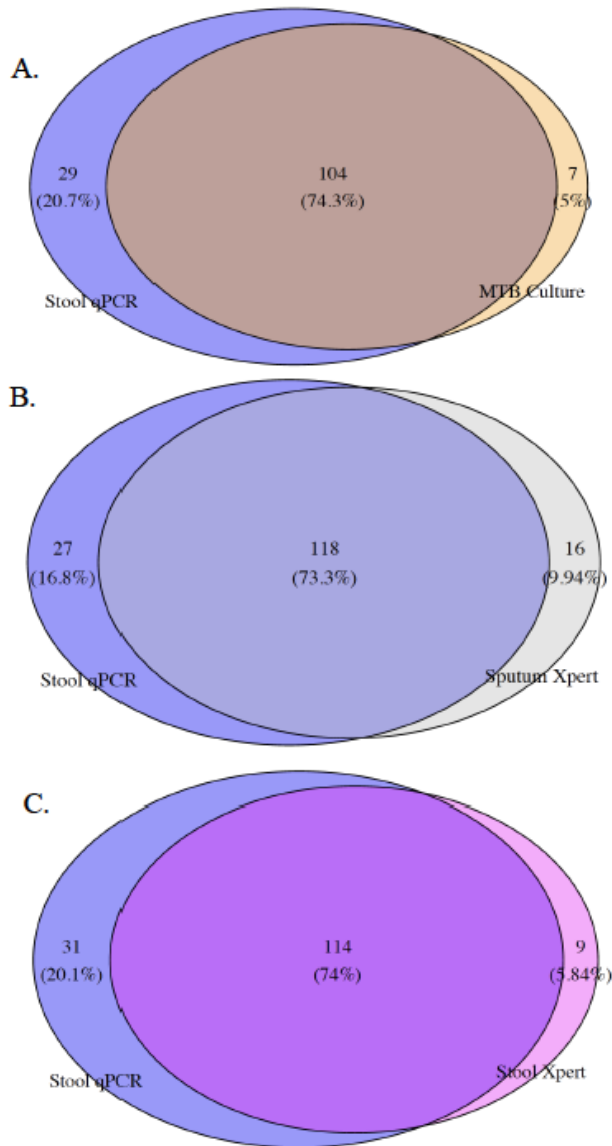

**Supplemental Figure 1 Legend:** Among participants with a diagnosis of tuberculosis and when both tests were performed, the stool qPCR results were compared to other tests of interest. Additive value was determined by the number of participants detected by stool qPCR, but not detected by the comparator test. A. Participants with tuberculosis and available *M tuberculosis* culture result from sputum and qPCR result from stool where the test result was positive by either or both tests (N = 140). B. Participants with tuberculosis and available Xpert-Ultra result from sputum and qPCR result from stool where the test result was positive by either or both tests (N = 163). C. Participants with tuberculosis who completed stool Xpert-Ultra and stool qPCR and where either test or both tests had positive results (N = 154).



**Supplemental Figure 2 A-B. Diagnostic Accuracy of the stool the novel qPCR and stool Xpert-Ultra performed on stool specimen for the diagnosis of tuberculosis when compared to the complete microbiologic reference standard.**

**A.**

| Cohort and Reference Standard | TP  | FN | Sensitivity (95% CI) |
|-------------------------------|-----|----|----------------------|
| Complete MRS                  | 118 | 22 | 84.3% (77.2, 89.9)   |
| PLHIV, Complete MRS           | 66  | 15 | 81.5% (71.3, 89.2)   |
| HIV NR, Complete MRS          | 51  | 7  | 87.9% (76.7, 95.0)   |
| Adolescent, Complete MRS      | 15  | 6  | 71.4% (47.8, 88.7)   |
| Adult, Complete MRS           | 103 | 16 | 86.6% (79.1, 92.1)   |

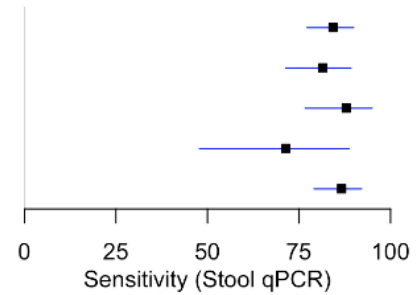

**B.**

| Cohort and Reference Standard | TP  | FN | Sensitivity (95% CI) |
|-------------------------------|-----|----|----------------------|
| Complete MRS                  | 107 | 31 | 77.5% (69.7, 84.2)   |
| PLHIV, Complete MRS           | 55  | 25 | 68.8% (57.4, 78.7)   |
| HIV NR, Complete MRS          | 52  | 5  | 91.2% (80.7, 97.1)   |
| Adolescent, Complete MRS      | 15  | 5  | 75.0% (50.9, 91.3)   |
| Adult, Complete MRS           | 92  | 26 | 78.2% (69.4, 85.1)   |

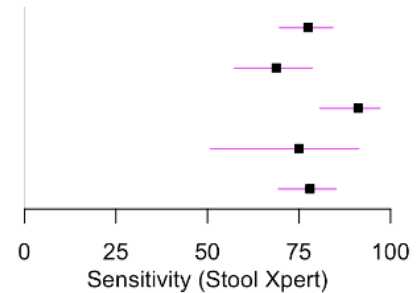

**Supplemental Figure 2 Legend:** (A) Sensitivity of the stool qPCR test compared with the complete microbiologic reference standard (Complete MRS). (B) Sensitivity of the stool Xpert test compared with the Complete MRS. Abbr: Complete MRS = complete microbiologic reference standard; PLHIV; people living with HIV, TP; true positive, FN; false negative.

**Supplemental Figure 3 A-C. Comparative and combined test positivity rates in participants with tuberculosis (including the sub-group living with HIV)**

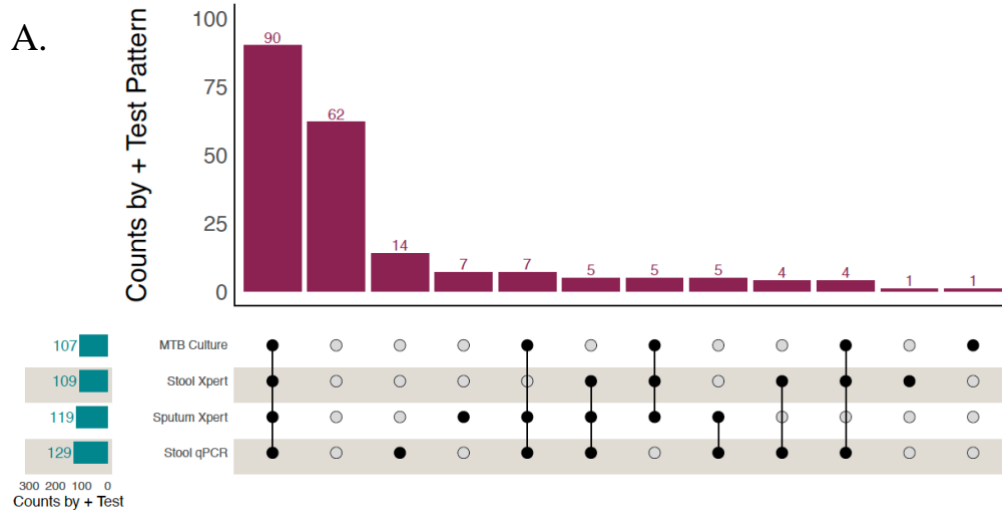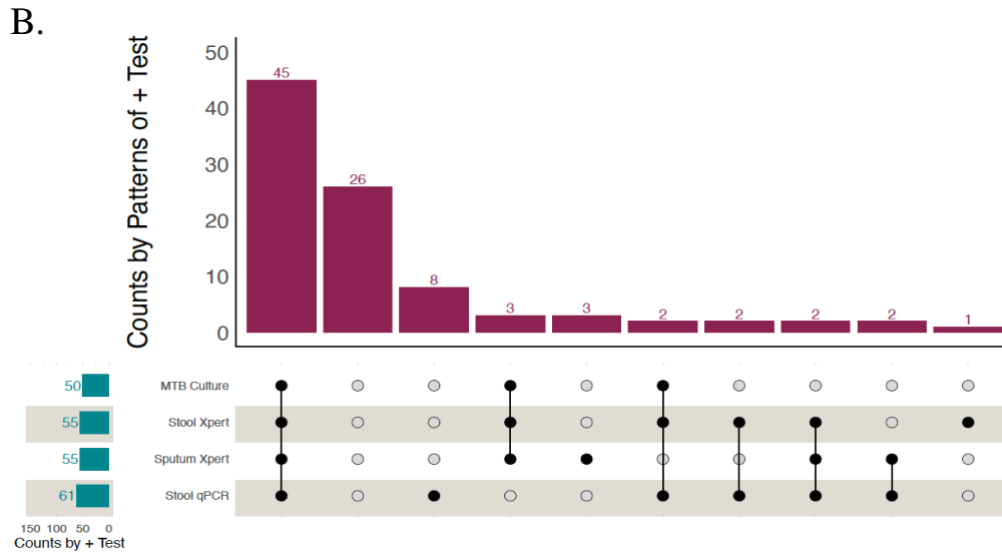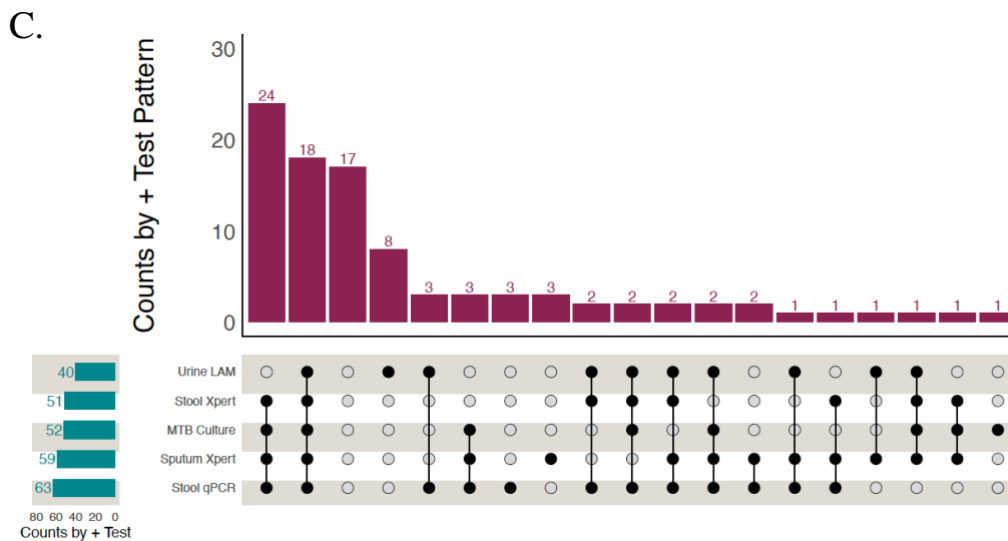

**Supplemental Figure 3 Legend**

**A. Comparative and combined test positivity rates in all participants with tuberculosis.** Among participants with tuberculosis, 205 completed all diagnostic tests; of these, 143 participants were positive by at least one test. This figure displays the counts of individual test positives (horizontal bars) and the counts of patterns of test positives (vertical bars and dot and lines).

**B. Comparative and combined test positivity rates in participants without HIV.** Among participants with tuberculosis and without HIV, 94 completed all diagnostic tests; of these, 68 participants were positive by at least one test. This figure displays the counts of individual test positives (horizontal bars) and the counts of patterns of test positives (vertical bars and dot and lines).

**C. Comparative and combined test positivity rates in participants with tuberculosis living with HIV.** Among participants with tuberculosis and living with HIV, 95 participants completed all diagnostic tests inclusive of urine LAM; of these, 78 participants were positive by at least one test. This figure displays the counts of individual test positives (horizontal bars) and the counts of patterns of test positives (vertical bars and dot and line).

### Supplemental Materials: Quantitative Polymerase Chain Reaction (qPCR) for stool samples assay protocol

- 1.0 Prepare 900  $\mu\text{Mol/L}$  primers, 100  $\mu\text{Mol/L}$  probe, and internal control and MTB standards reagents prior to decrease contamination.
- 2.0 Prepare the master mix for 400 wells for both the internal control and the MTB plates separately (*Supplemental Table 4*).
- 3.0 Using a multichannel pipette, aliquot 5 $\mu\text{l}$  of the organism specific mastermix to all wells and add 2  $\mu\text{l}$  nuclease free water to the no template control (NTC) wells.
- 4.0 Cover the plate with aluminum foil. With a pipette, add 2  $\mu\text{l}$  of unknown DNA sample to each well (in duplicates) by piercing through the foil for each well.
- 5.0 Add 2  $\mu\text{l}$  of prepared standards and then cover the pierced wells with a strip of foil to avoid contamination due to open wells.
- 6.0 Centrifuge the plate for 1 minute at 1000RPM to settle the reagents.
- 7.0 Remove the aluminum foil and cover the plate with adhesive optical film, then centrifuge the plate at 1000 RPM for 2 minutes.
- 8.0 The plate is ready for amplification, put in the Quant Studio machine. The mode should be set to fast, whilst the hold and PCR stage should be 95  $^{\circ}\text{C} \times 20$  seconds and 95  $^{\circ}\text{C} \times 1$  seconds and 60  $^{\circ}\text{C} \times 20$  seconds respectively for 40 cycles. The fluorescence will be captured during the cycle.
- 9.0 After completion of the run, the test validity should have a correlation value of above 0.95. The standards should be about 3-4 ct values apart.

This table shows the Master Mix constituents with the required volumes and concentrations for both the MTB and internal control plates.

| <b><u>Samples per well: 7 <math>\mu\text{l}</math> Total</u></b> | <b><u>For 100 wells</u></b> | <b><u>For 400 wells</u></b> | <b><u>For 800 wells</u></b> |
|------------------------------------------------------------------|-----------------------------|-----------------------------|-----------------------------|
| Taqman 2x Fast mix: 3.5 $\mu\text{l}$                            | 350 $\mu\text{l}$           | 1400 $\mu\text{l}$          | 2800 $\mu\text{l}$          |
| Forward primer (900 $\mu\text{M}$ ): 0.007 $\mu\text{l}$         | 0.7 $\mu\text{l}$           | 2.8 $\mu\text{l}$           | 5.6 $\mu\text{l}$           |
| Reverse primer (900 $\mu\text{M}$ ): 0.007 $\mu\text{l}$         | 0.07 $\mu\text{l}$          | 2.8 $\mu\text{l}$           | 5.6 $\mu\text{l}$           |
| Probe (100 $\mu\text{M}$ ): 0.0175 $\mu\text{l}$                 | 1.75 $\mu\text{l}$          | 7 $\mu\text{l}$             | 14 $\mu\text{l}$            |
| Water: 1.47 $\mu\text{l}$                                        | 147 $\mu\text{l}$           | 588 $\mu\text{l}$           | 1176 $\mu\text{l}$          |

To prepare standards, dilute 1:1000 by adding 1  $\mu\text{l}$  of IC/ H37Rv DNA in 999  $\mu\text{l}$  of nuclease free water. Make 10-fold dilutions by taking 100  $\mu\text{l}$  of standard 1 into 900  $\mu\text{l}$  nuclease free water. Change tips between each dilution and vortex at maximum speed for 3 seconds in order to mix well. Repeat the above step for the total of 5 standards. Notably, the internal control is run in single and not duplicates.
